# Supplementary material for: Safranal Inhibits Angiogenesis via Targeting HIF-1α/VEGF Machinery: In Vitro and Ex Vivo Insights
Source: PubMed Central journal article supplement (PMC8862147; doi:10.3389/fonc.2021.789172), 2022-02-02
Supplement: Table_1.pdf [file Table_1.pdf]

| <b>GENE</b> | <b>Forward Primer (5' TO 3')</b> |  | <b>Reverse Primer (5' TO 3')</b> |
|-------------|----------------------------------|--|----------------------------------|
|             |                                  |  |                                  |
| HIF1A       | CACCACAGGACAGTACAGGAT            |  | CGTGCTGAATAATACCACTCACA          |
| VEGF        | ATCTTCAAGCCATCCTGTGTGC           |  | CAAGGCCACAGGGATTTTC              |
| VEGFR2      | AGGCAGCTCACAGTCCTAGAGC           |  | GTCTTTTCCTGGGCACCTTCTA           |
